# Supplementary material
Source: publisher figshare collection journal article supplement (https://aacr.figshare.com/articles/dataset/_/23561000)
Supplement: Supplementary file 1 [file 41334806]

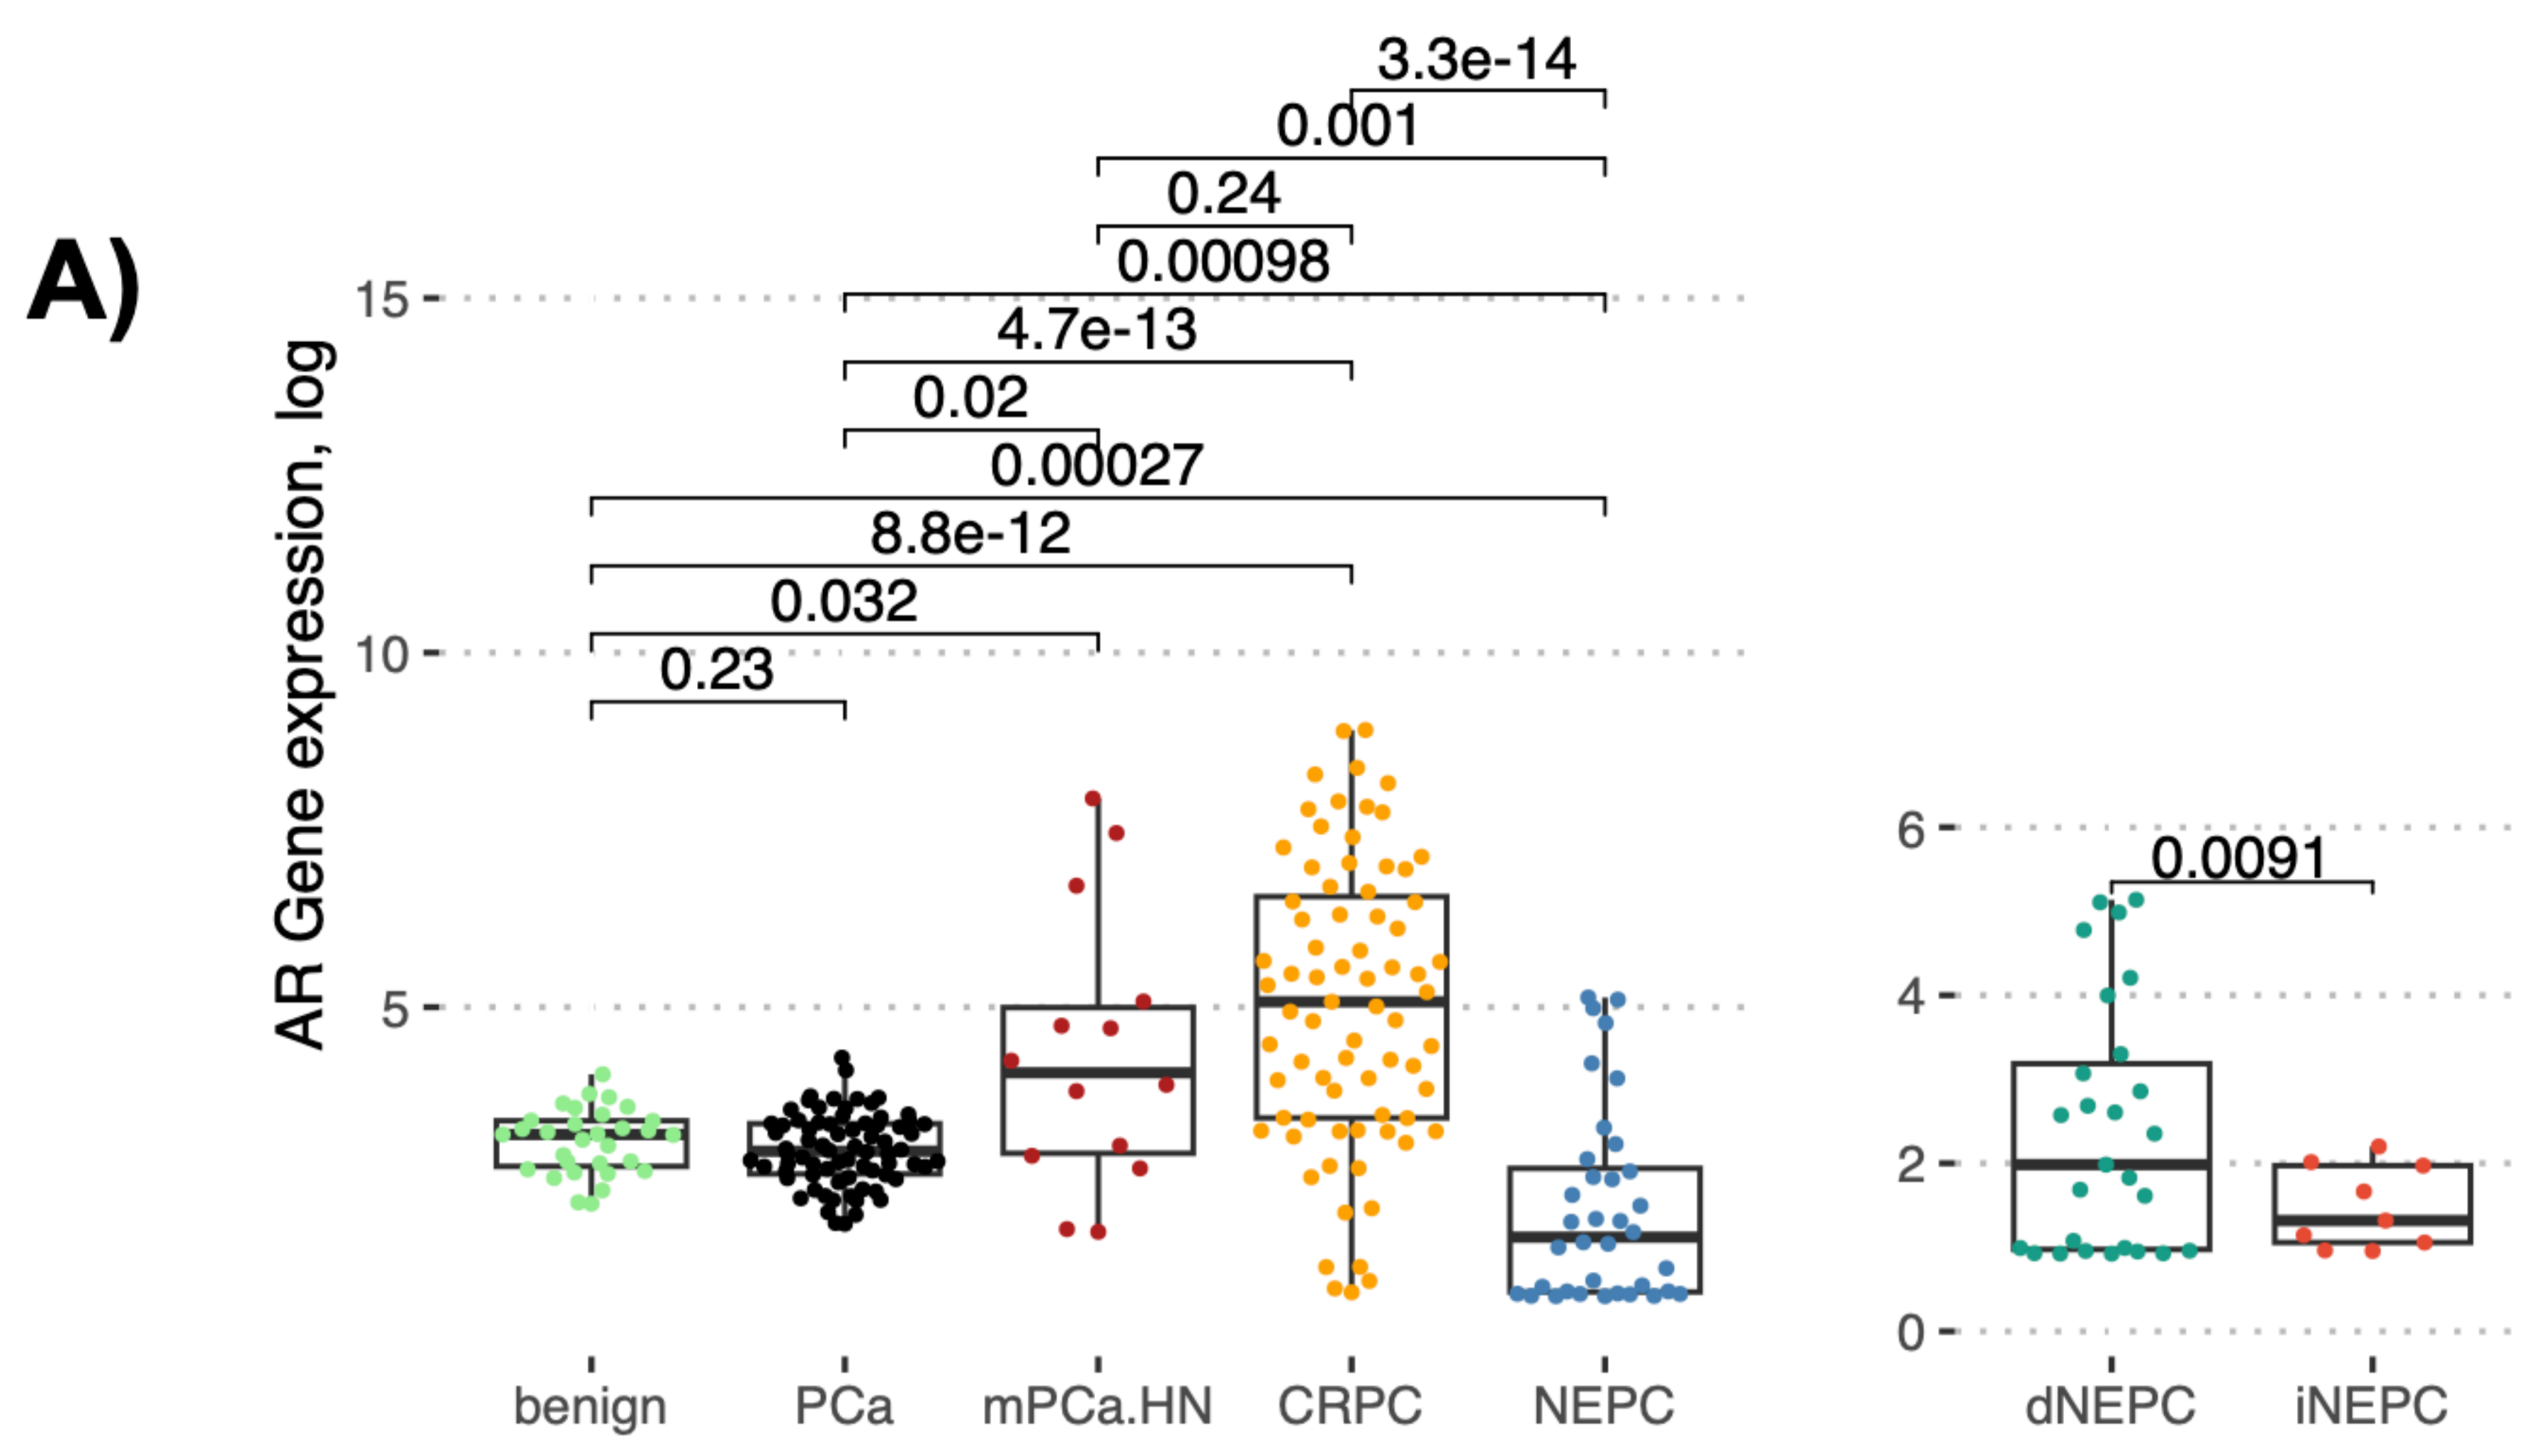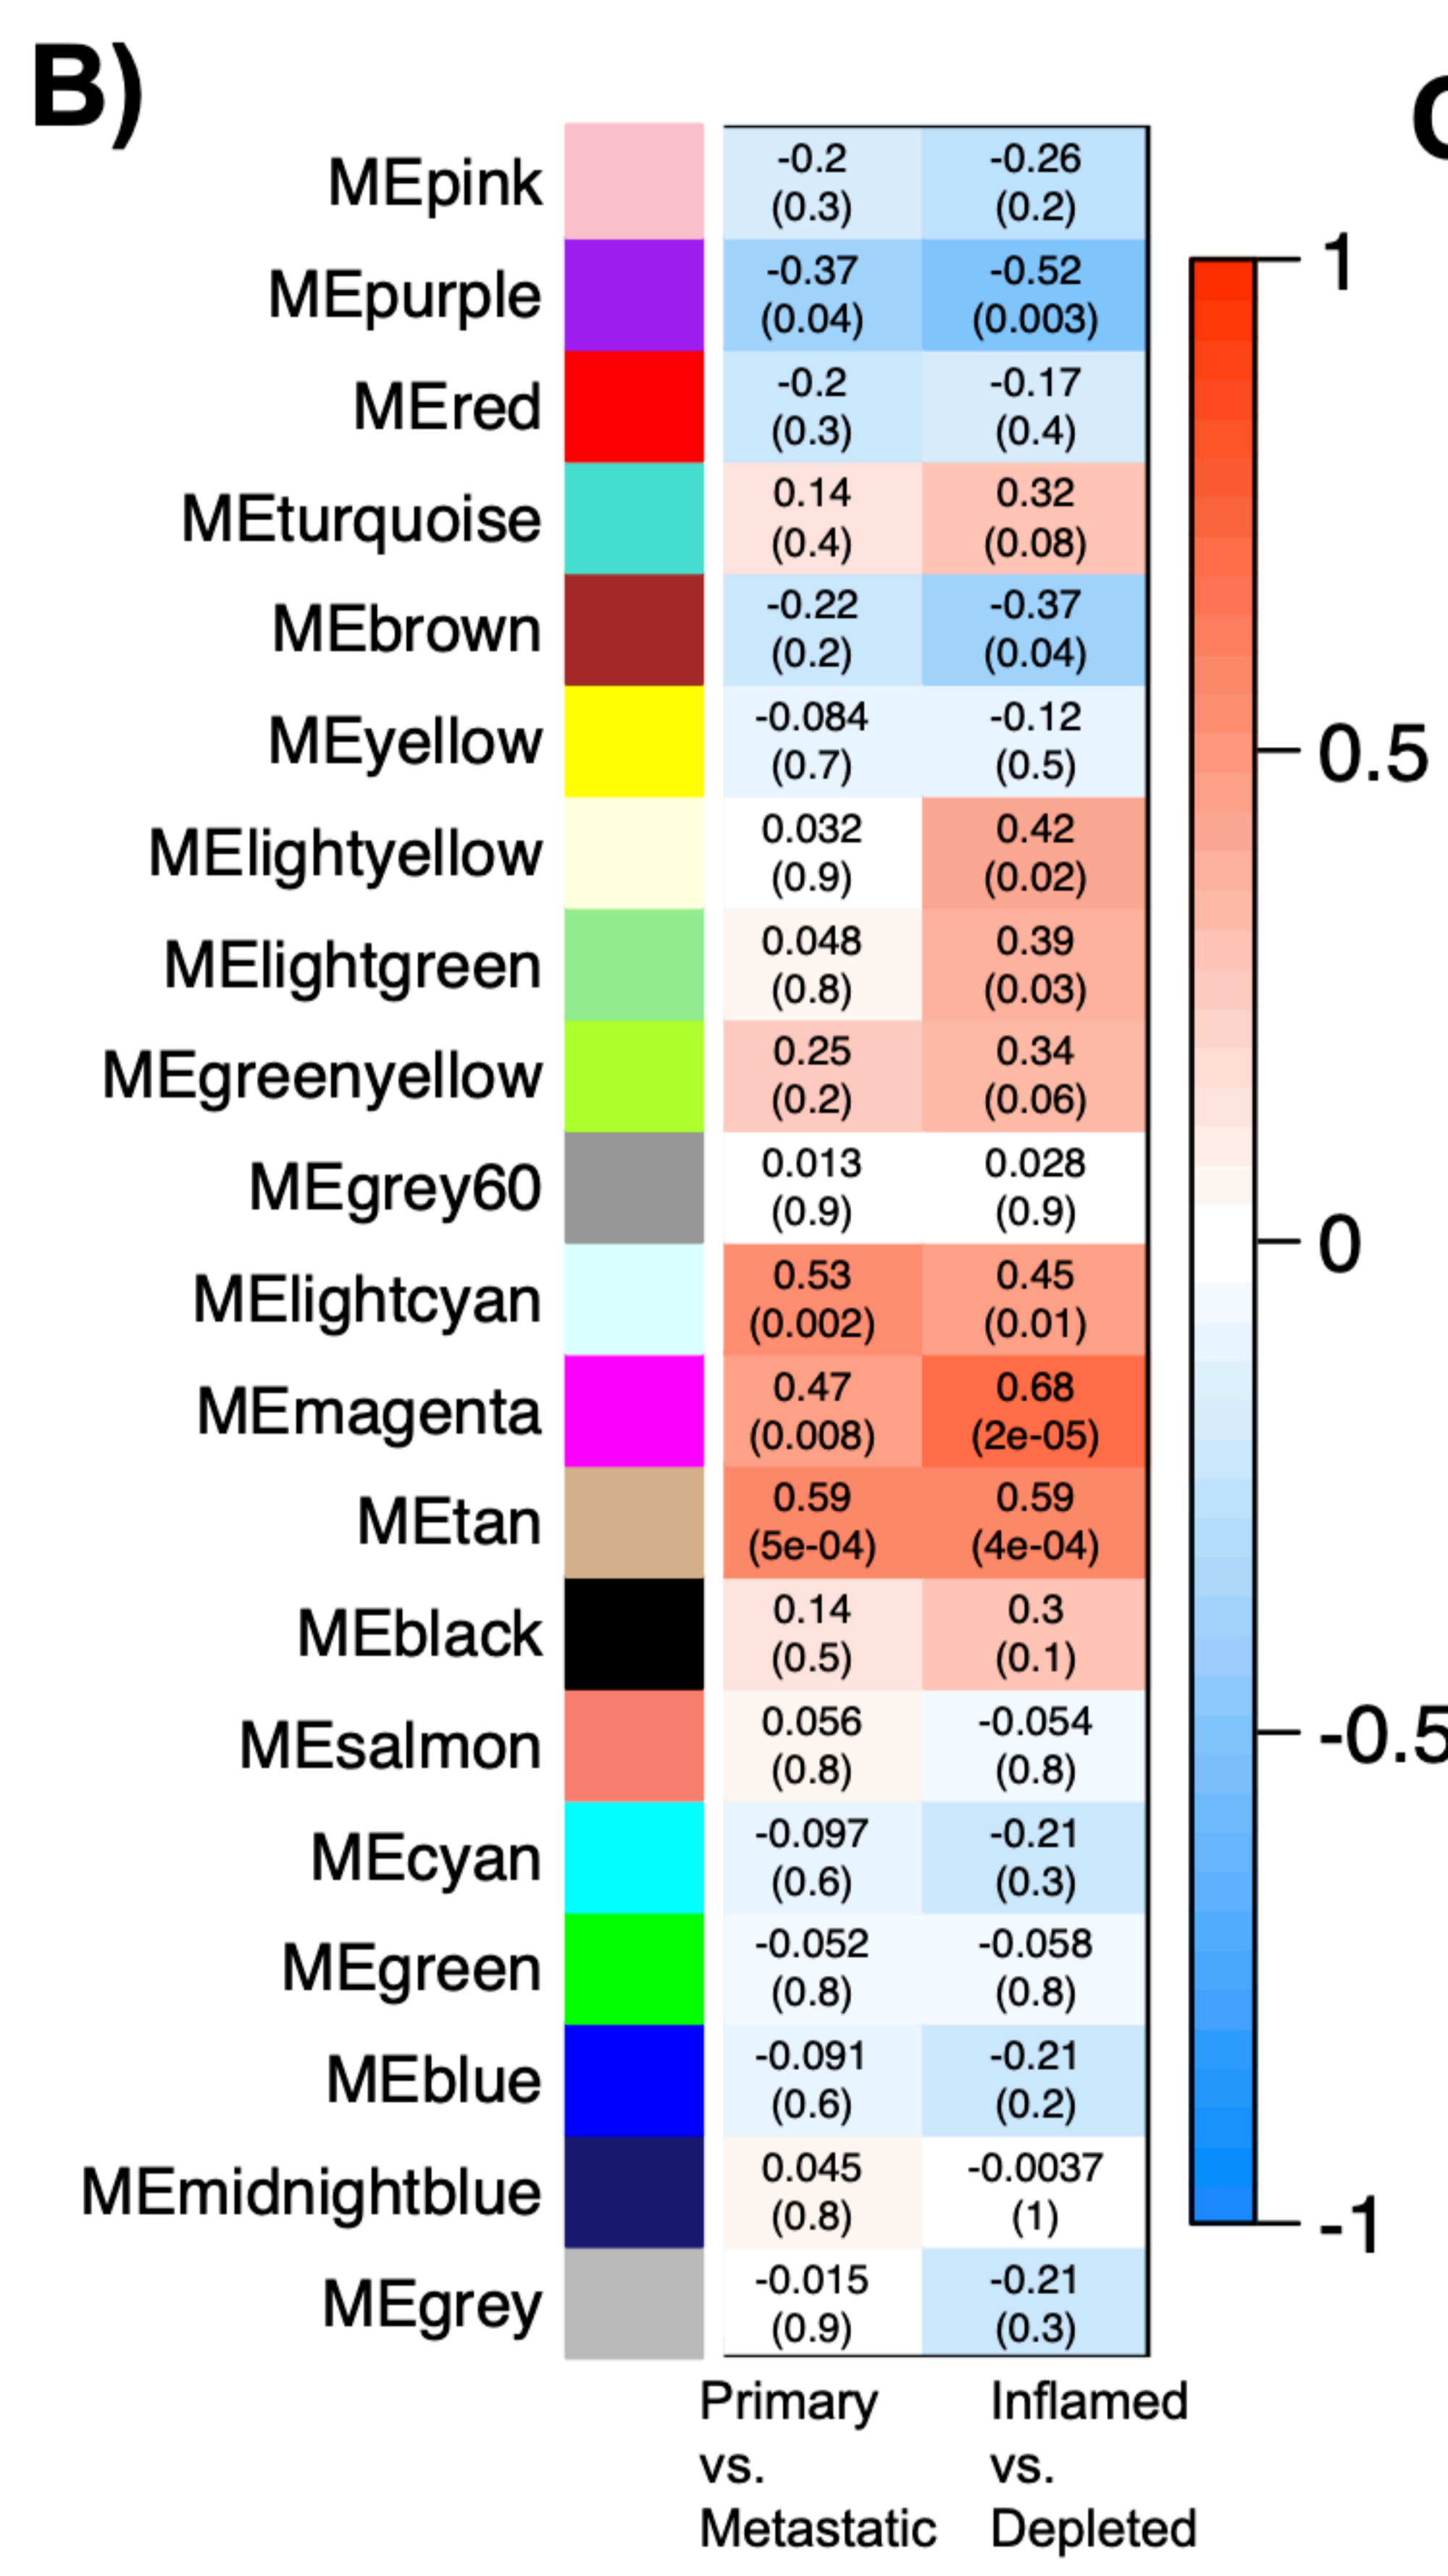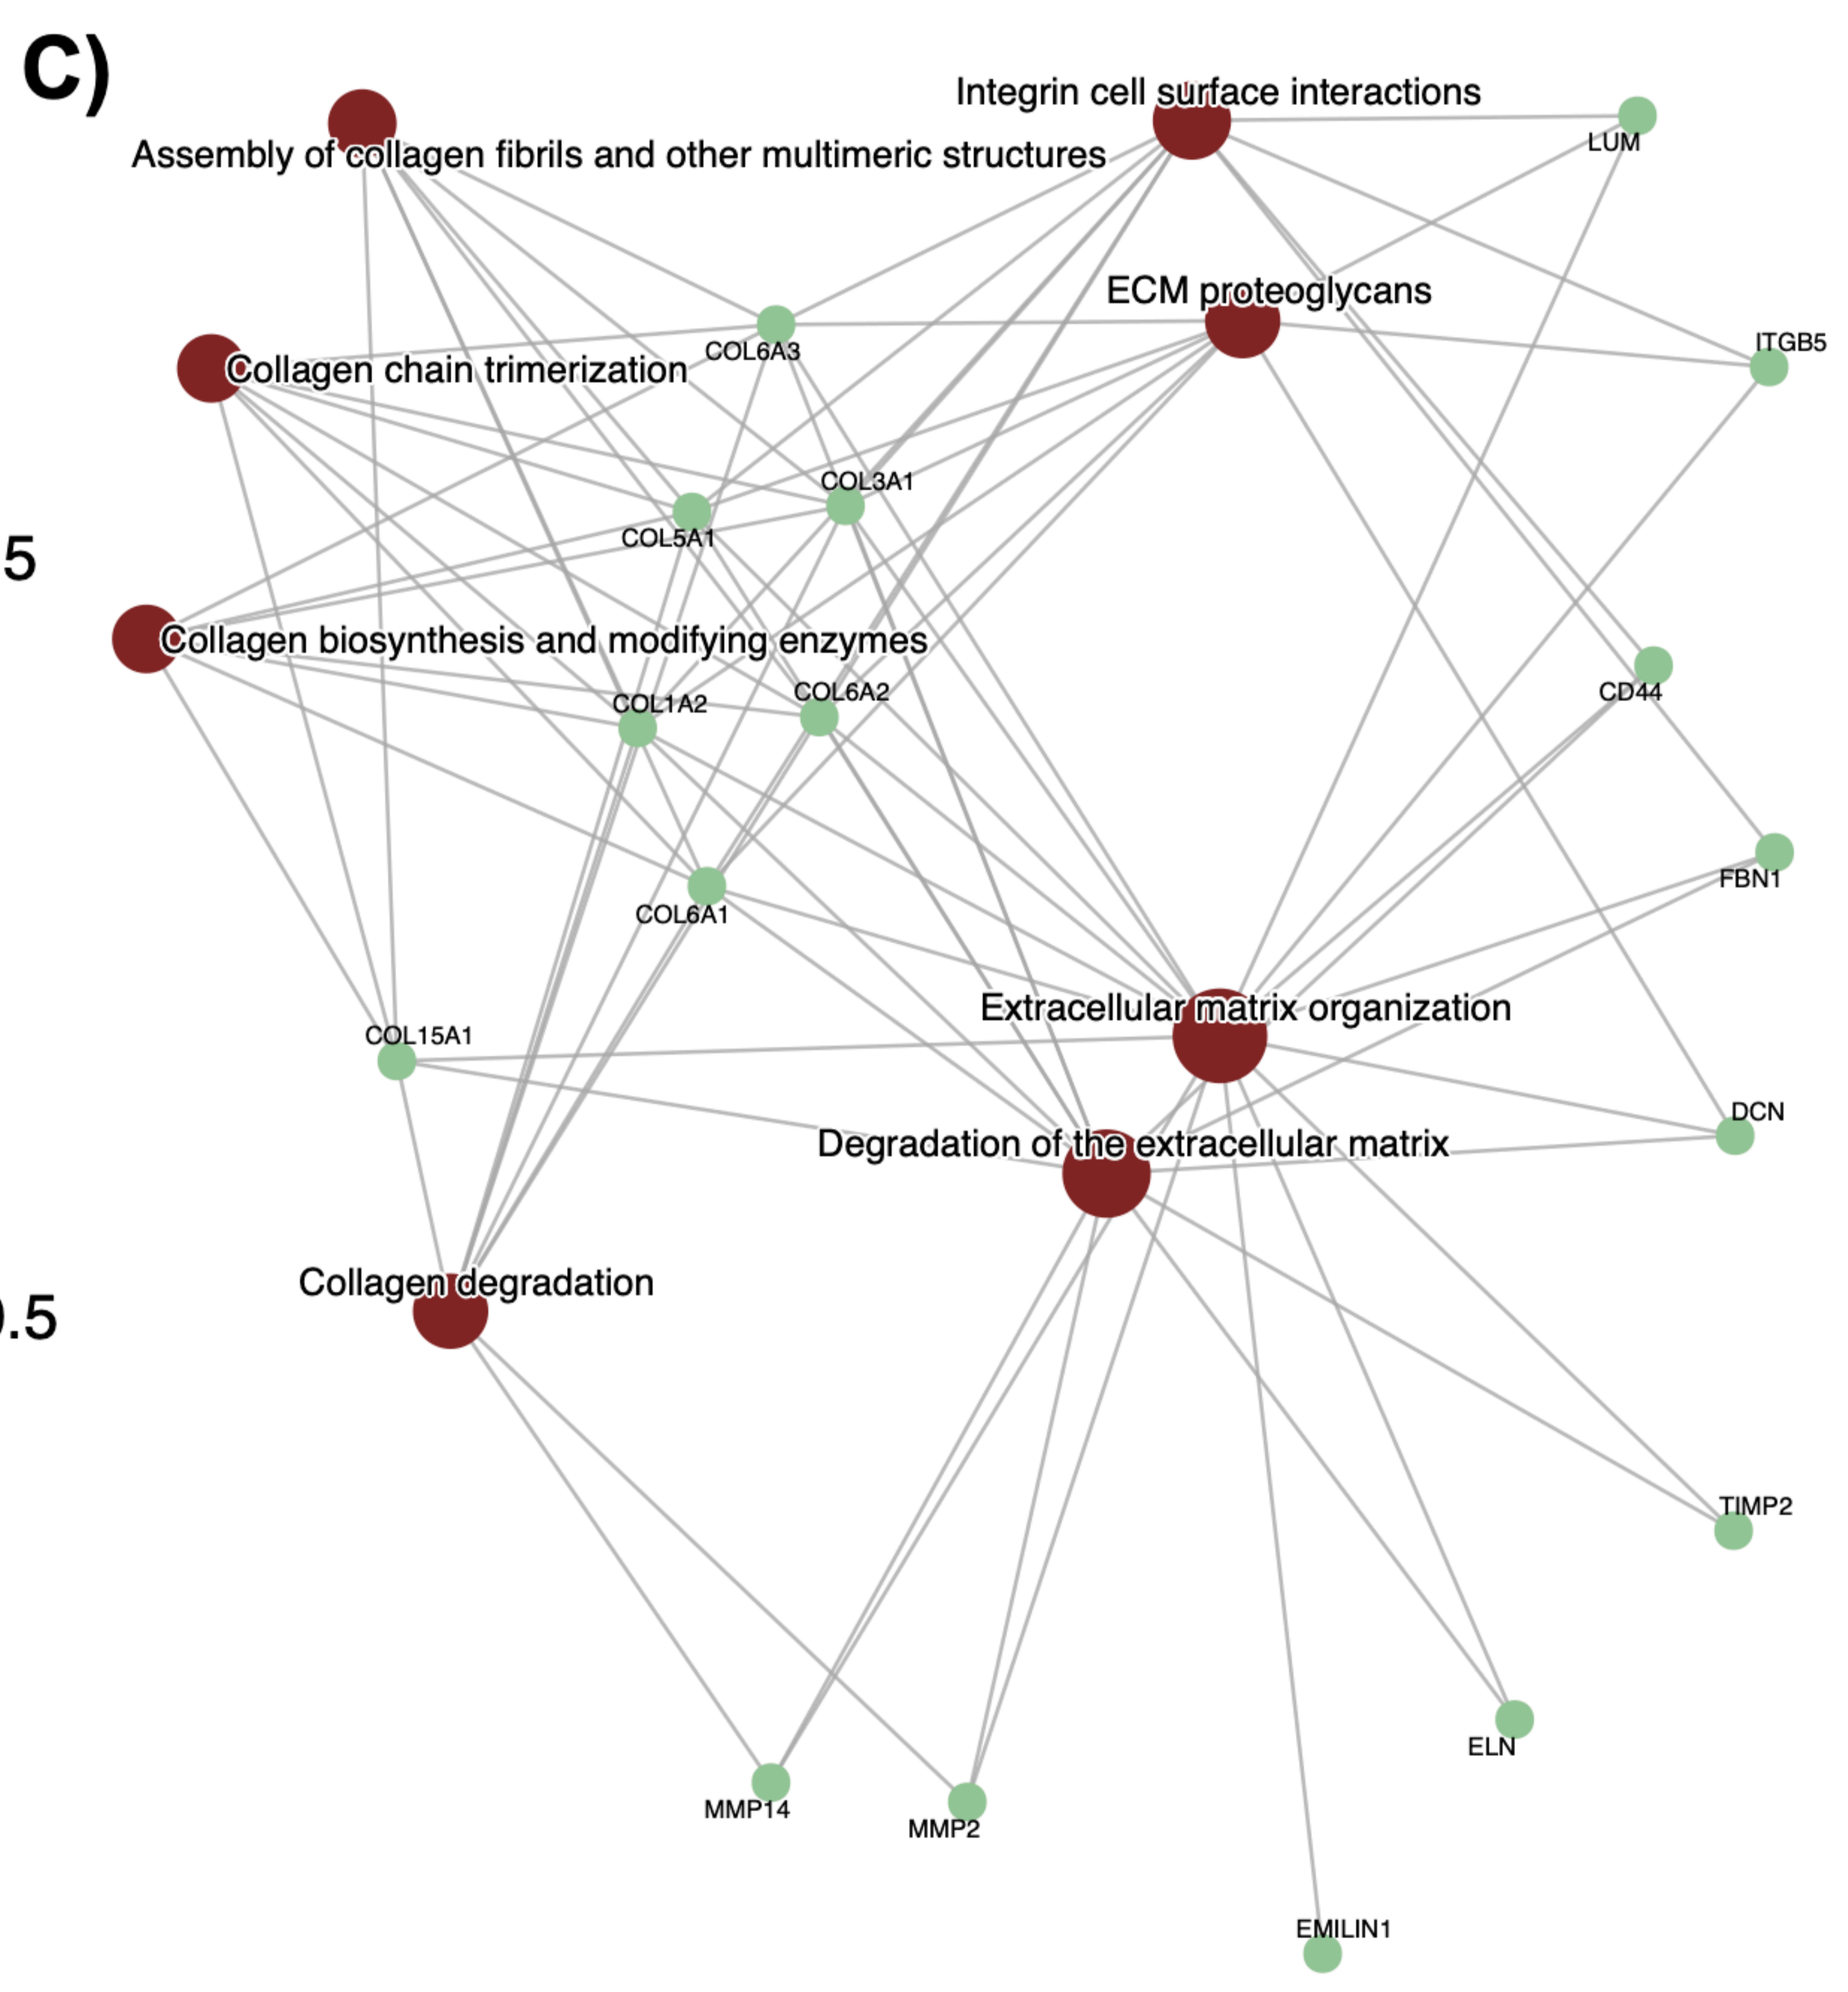

Suppl Figure 3. Identification of gene modules associated with NEPC T-cell immune classes. A) Boxplots showing difference in expression of AR gene among the prostate cancer types and the two NEPC T-cell immune classes, iNEPC and dNEPC. The p value is reported from the t-test. B) Heatmap showing the Pearson correlations and its p-value for the pairwise module-trait relationships obtained from the WGCNA analysis. The y-axis denoted the different WGCNA modules, and the x-axis denotes the pairwise combinations tested, C) Enrichment maps for WGCNA module (MEtan) enriched in the inflamed NEPC cases. The map shows the network of key module genes and overrepresented pathways from the REACTOME database.
